# Supplementary material
Source: Research Square preprint supplement (doi:10.21203/rs.3.rs-8867294/v1)
Supplement: Supplementary file 1 [file 8d3603f84a0c4be2fd200797.xlsx]

## Sheet: TableS1. Literature search
Number	Type	Common name	Species	DNM rate	Sanger	Number of Trio	Note	Citation
1	birds	penguin	Pygoscelis adeliae	1.5e-08	NO	1		Bergeron, L. A., Besenbacher, S., Zheng, J., Li, P., Bertelsen, M. F., Quintard, B., ... & Zhang, G. (2023). Evolution of the germline mutation rate across vertebrates. Nature, 1-7.
2	mammals	alpaca	Vicugna pacos	9.44e-09	NO	1		Bergeron, L. A., Besenbacher, S., Zheng, J., Li, P., Bertelsen, M. F., Quintard, B., ... & Zhang, G. (2023). Evolution of the germline mutation rate across vertebrates. Nature, 1-8.
3	mammals	guinea pig	Cavia aperea	8.72e-09	NO	6		Bergeron, L. A., Besenbacher, S., Zheng, J., Li, P., Bertelsen, M. F., Quintard, B., ... & Zhang, G. (2023). Evolution of the germline mutation rate across vertebrates. Nature, 1-9.
4	birds	blue tit	Cyanistes caeruleus	5.19e-09	NO	3		Bergeron, L. A., Besenbacher, S., Zheng, J., Li, P., Bertelsen, M. F., Quintard, B., ... & Zhang, G. (2023). Evolution of the germline mutation rate across vertebrates. Nature, 1-10.
5	mammals	fruit bat	Rousettus aegyptiacus	8.1e-09	NO	1		Bergeron, L. A., Besenbacher, S., Zheng, J., Li, P., Bertelsen, M. F., Quintard, B., ... & Zhang, G. (2023). Evolution of the germline mutation rate across vertebrates. Nature, 1-11.
6	fish	Siamese fighting fish	Betta splendens	4.97e-09	NO	3		Bergeron, L. A., Besenbacher, S., Zheng, J., Li, P., Bertelsen, M. F., Quintard, B., ... & Zhang, G. (2023). Evolution of the germline mutation rate across vertebrates. Nature, 1-12.
7	reptiles	gecko	Sphaerodactylus inigoi	1.36e-08	NO	1		Bergeron, L. A., Besenbacher, S., Zheng, J., Li, P., Bertelsen, M. F., Quintard, B., ... & Zhang, G. (2023). Evolution of the germline mutation rate across vertebrates. Nature, 1-13.
8	birds	common blackbird	Turdus merula	6.96e-09	NO	4		Bergeron, L. A., Besenbacher, S., Zheng, J., Li, P., Bertelsen, M. F., Quintard, B., ... & Zhang, G. (2023). Evolution of the germline mutation rate across vertebrates. Nature, 1-14.
9	primates	bolivian squirrel monkey	Saimiri boliviensis boliviensis	6.92e-09	NO	3		Bergeron, L. A., Besenbacher, S., Zheng, J., Li, P., Bertelsen, M. F., Quintard, B., ... & Zhang, G. (2023). Evolution of the germline mutation rate across vertebrates. Nature, 1-15.
10	fish	common carp	Cyprinus carpio	5.62e-09	NO	1		Bergeron, L. A., Besenbacher, S., Zheng, J., Li, P., Bertelsen, M. F., Quintard, B., ... & Zhang, G. (2023). Evolution of the germline mutation rate across vertebrates. Nature, 1-16.
11	mammals	domestic cat	Felis catus	3.49e-09	NO	1		Bergeron, L. A., Besenbacher, S., Zheng, J., Li, P., Bertelsen, M. F., Quintard, B., ... & Zhang, G. (2023). Evolution of the germline mutation rate across vertebrates. Nature, 1-17.
12	birds	chicken	Gallus gallus domesticus	3.62e-09	NO	1		Bergeron, L. A., Besenbacher, S., Zheng, J., Li, P., Bertelsen, M. F., Quintard, B., ... & Zhang, G. (2023). Evolution of the germline mutation rate across vertebrates. Nature, 1-18.
13	primates	chimpanzee	Pan troglodytes	1.25e-08	NO	1		Bergeron, L. A., Besenbacher, S., Zheng, J., Li, P., Bertelsen, M. F., Quintard, B., ... & Zhang, G. (2023). Evolution of the germline mutation rate across vertebrates. Nature, 1-19.
14	fish	large yellow croaker	Larimichthys crocea	2.25e-09	NO	1		Bergeron, L. A., Besenbacher, S., Zheng, J., Li, P., Bertelsen, M. F., Quintard, B., ... & Zhang, G. (2023). Evolution of the germline mutation rate across vertebrates. Nature, 1-20.
15	mammals	tasmanian devil	Sarcophilus harrisii	5.94e-09	NO	1		Bergeron, L. A., Besenbacher, S., Zheng, J., Li, P., Bertelsen, M. F., Quintard, B., ... & Zhang, G. (2023). Evolution of the germline mutation rate across vertebrates. Nature, 1-21.
16	mammals	dog	Canis lupus familiaris	8.68e-09	NO	4		Bergeron, L. A., Besenbacher, S., Zheng, J., Li, P., Bertelsen, M. F., Quintard, B., ... & Zhang, G. (2023). Evolution of the germline mutation rate across vertebrates. Nature, 1-22.
17	mammals	bottlenosed dolphin	Tursiops truncatus	8.83e-09	NO	1		Bergeron, L. A., Besenbacher, S., Zheng, J., Li, P., Bertelsen, M. F., Quintard, B., ... & Zhang, G. (2023). Evolution of the germline mutation rate across vertebrates. Nature, 1-23.
18	primates	drill	Mandrillus leucophaeus	6.33e-09	NO	2		Bergeron, L. A., Besenbacher, S., Zheng, J., Li, P., Bertelsen, M. F., Quintard, B., ... & Zhang, G. (2023). Evolution of the germline mutation rate across vertebrates. Nature, 1-24.
19	birds	herring gull	Larus argentatus	7.41e-09	NO	7		Bergeron, L. A., Besenbacher, S., Zheng, J., Li, P., Bertelsen, M. F., Quintard, B., ... & Zhang, G. (2023). Evolution of the germline mutation rate across vertebrates. Nature, 1-25.
20	birds	emperor penguin	Aptenodytes forsteri	1.41e-08	NO	1		Bergeron, L. A., Besenbacher, S., Zheng, J., Li, P., Bertelsen, M. F., Quintard, B., ... & Zhang, G. (2023). Evolution of the germline mutation rate across vertebrates. Nature, 1-26.
21	birds	greater flamingo	Phoenicopterus roseus	1.65e-08	NO	1		Bergeron, L. A., Besenbacher, S., Zheng, J., Li, P., Bertelsen, M. F., Quintard, B., ... & Zhang, G. (2023). Evolution of the germline mutation rate across vertebrates. Nature, 1-27.
22	fish	japanese flounder	Paralichthys olivaceus	8.52e-09	NO	2		Bergeron, L. A., Besenbacher, S., Zheng, J., Li, P., Bertelsen, M. F., Quintard, B., ... & Zhang, G. (2023). Evolution of the germline mutation rate across vertebrates. Nature, 1-28.
23	mammals	red fox	Vulpes vulpes	4.46e-09	NO	1		Bergeron, L. A., Besenbacher, S., Zheng, J., Li, P., Bertelsen, M. F., Quintard, B., ... & Zhang, G. (2023). Evolution of the germline mutation rate across vertebrates. Nature, 1-29.
24	birds	great black-backed gull	Larus marinus	8.72e-09	NO	2		Bergeron, L. A., Besenbacher, S., Zheng, J., Li, P., Bertelsen, M. F., Quintard, B., ... & Zhang, G. (2023). Evolution of the germline mutation rate across vertebrates. Nature, 1-30.
25	reptiles	common garter snake	Thamnophis sirtalis	2.54e-08	NO	3		Bergeron, L. A., Besenbacher, S., Zheng, J., Li, P., Bertelsen, M. F., Quintard, B., ... & Zhang, G. (2023). Evolution of the germline mutation rate across vertebrates. Nature, 1-31.
26	primates	lar gibbon	Hylobates lar	7.05e-09	NO	1		Bergeron, L. A., Besenbacher, S., Zheng, J., Li, P., Bertelsen, M. F., Quintard, B., ... & Zhang, G. (2023). Evolution of the germline mutation rate across vertebrates. Nature, 1-32.
27	mammals	giraffe	Giraffa camelopardalis	1e-08	NO	1		Bergeron, L. A., Besenbacher, S., Zheng, J., Li, P., Bertelsen, M. F., Quintard, B., ... & Zhang, G. (2023). Evolution of the germline mutation rate across vertebrates. Nature, 1-33.
28	mammals	goat	Capra hircus	5.25e-09	NO	3		Bergeron, L. A., Besenbacher, S., Zheng, J., Li, P., Bertelsen, M. F., Quintard, B., ... & Zhang, G. (2023). Evolution of the germline mutation rate across vertebrates. Nature, 1-34.
29	mammals	hippopotamus	Hippopotamus amphibius	1.18e-08	NO	1		Bergeron, L. A., Besenbacher, S., Zheng, J., Li, P., Bertelsen, M. F., Quintard, B., ... & Zhang, G. (2023). Evolution of the germline mutation rate across vertebrates. Nature, 1-35.
30	primates	human	Homo sapiens	1.16e-08	NO	2		Bergeron, L. A., Besenbacher, S., Zheng, J., Li, P., Bertelsen, M. F., Quintard, B., ... & Zhang, G. (2023). Evolution of the germline mutation rate across vertebrates. Nature, 1-36.
31	mammals	Rock hyrax	Procavia capensis	9.18e-09	NO	3		Bergeron, L. A., Besenbacher, S., Zheng, J., Li, P., Bertelsen, M. F., Quintard, B., ... & Zhang, G. (2023). Evolution of the germline mutation rate across vertebrates. Nature, 1-37.
32	reptiles	gecko	Eublepharis macularius	5.74e-09	NO	1		Bergeron, L. A., Besenbacher, S., Zheng, J., Li, P., Bertelsen, M. F., Quintard, B., ... & Zhang, G. (2023). Evolution of the germline mutation rate across vertebrates. Nature, 1-38.
33	mammals	leopard	Panthera pardus	8.83e-09	NO	1		Bergeron, L. A., Besenbacher, S., Zheng, J., Li, P., Bertelsen, M. F., Quintard, B., ... & Zhang, G. (2023). Evolution of the germline mutation rate across vertebrates. Nature, 1-39.
34	birds	blue-throated macaw	Ara glaucogularis	1e-08	NO	1		Bergeron, L. A., Besenbacher, S., Zheng, J., Li, P., Bertelsen, M. F., Quintard, B., ... & Zhang, G. (2023). Evolution of the germline mutation rate across vertebrates. Nature, 1-40.
35	mammals	american mink	Neogale vison	4.64e-09	NO	1		Bergeron, L. A., Besenbacher, S., Zheng, J., Li, P., Bertelsen, M. F., Quintard, B., ... & Zhang, G. (2023). Evolution of the germline mutation rate across vertebrates. Nature, 1-41.
36	mammals	damara mole rat	Fukomys damarensis	7.41e-09	NO	4		Bergeron, L. A., Besenbacher, S., Zheng, J., Li, P., Bertelsen, M. F., Quintard, B., ... & Zhang, G. (2023). Evolution of the germline mutation rate across vertebrates. Nature, 1-42.
37	mammals	house mouse	Mus musculus	5.34e-09	NO	1		Bergeron, L. A., Besenbacher, S., Zheng, J., Li, P., Bertelsen, M. F., Quintard, B., ... & Zhang, G. (2023). Evolution of the germline mutation rate across vertebrates. Nature, 1-43.
38	mammals	forest musk deer	Moschus berezovskii	1e-08	NO	1		Bergeron, L. A., Besenbacher, S., Zheng, J., Li, P., Bertelsen, M. F., Quintard, B., ... & Zhang, G. (2023). Evolution of the germline mutation rate across vertebrates. Nature, 1-44.
39	fish	common clown fish	Amphiprion ocellaris	7.36e-09	NO	2		Bergeron, L. A., Besenbacher, S., Zheng, J., Li, P., Bertelsen, M. F., Quintard, B., ... & Zhang, G. (2023). Evolution of the germline mutation rate across vertebrates. Nature, 1-45.
40	mammals	Gray short-tailed opossums	Monodelphis domestica	4.601e-09	NO	1		Bergeron, L. A., Besenbacher, S., Zheng, J., Li, P., Bertelsen, M. F., Quintard, B., ... & Zhang, G. (2023). Evolution of the germline mutation rate across vertebrates. Nature, 1-46.
41	mammals	killer whale	Orcinus orca	1.41e-08	NO	1		Bergeron, L. A., Besenbacher, S., Zheng, J., Li, P., Bertelsen, M. F., Quintard, B., ... & Zhang, G. (2023). Evolution of the germline mutation rate across vertebrates. Nature, 1-47.
42	birds	snowy owl	Bubo scandiacus	9.79e-10	NO	1		Bergeron, L. A., Besenbacher, S., Zheng, J., Li, P., Bertelsen, M. F., Quintard, B., ... & Zhang, G. (2023). Evolution of the germline mutation rate across vertebrates. Nature, 1-48.
43	birds	dalmatian pelican	Pelecanus crispus	9.12e-09	NO	1		Bergeron, L. A., Besenbacher, S., Zheng, J., Li, P., Bertelsen, M. F., Quintard, B., ... & Zhang, G. (2023). Evolution of the germline mutation rate across vertebrates. Nature, 1-49.
44	mammals	pig	Sus scrofa	4.31e-09	NO	7		Bergeron, L. A., Besenbacher, S., Zheng, J., Li, P., Bertelsen, M. F., Quintard, B., ... & Zhang, G. (2023). Evolution of the germline mutation rate across vertebrates. Nature, 1-50.
45	fish	gulf pipefish	Syngnathus scovelli	5.61e-09	NO	6		Bergeron, L. A., Besenbacher, S., Zheng, J., Li, P., Bertelsen, M. F., Quintard, B., ... & Zhang, G. (2023). Evolution of the germline mutation rate across vertebrates. Nature, 1-51.
46	reptiles	Central bearded dragon	Pogona vitticeps	1.43e-08	NO	3		Bergeron, L. A., Besenbacher, S., Zheng, J., Li, P., Bertelsen, M. F., Quintard, B., ... & Zhang, G. (2023). Evolution of the germline mutation rate across vertebrates. Nature, 1-52.
47	birds	Quails	Coturnix japonica	5.67e-09	NO	8		Bergeron, L. A., Besenbacher, S., Zheng, J., Li, P., Bertelsen, M. F., Quintard, B., ... & Zhang, G. (2023). Evolution of the germline mutation rate across vertebrates. Nature, 1-53.
48	mammals	Reindeer	Rangifer tarandus	5.89e-09	NO	2		Bergeron, L. A., Besenbacher, S., Zheng, J., Li, P., Bertelsen, M. F., Quintard, B., ... & Zhang, G. (2023). Evolution of the germline mutation rate across vertebrates. Nature, 1-54.
49	mammals	Red panda	Ailurus fulgens	1.3e-08	NO	2		Bergeron, L. A., Besenbacher, S., Zheng, J., Li, P., Bertelsen, M. F., Quintard, B., ... & Zhang, G. (2023). Evolution of the germline mutation rate across vertebrates. Nature, 1-55.
50	mammals	Red deer	Cervus elaphus yarkandensis	6.71e-09	NO	1		Bergeron, L. A., Besenbacher, S., Zheng, J., Li, P., Bertelsen, M. F., Quintard, B., ... & Zhang, G. (2023). Evolution of the germline mutation rate across vertebrates. Nature, 1-56.
51	birds	Darwin's rhea	Rhea pennata	3.97e-08	NO	1		Bergeron, L. A., Besenbacher, S., Zheng, J., Li, P., Bertelsen, M. F., Quintard, B., ... & Zhang, G. (2023). Evolution of the germline mutation rate across vertebrates. Nature, 1-57.
52	mammals	Southern White Rhinoceros	Ceratotherium simum simum	9.56e-09	NO	1		Bergeron, L. A., Besenbacher, S., Zheng, J., Li, P., Bertelsen, M. F., Quintard, B., ... & Zhang, G. (2023). Evolution of the germline mutation rate across vertebrates. Nature, 1-58.
53	primates	white-faced saki	Pithecia pithecia	9.92e-09	NO	5		Bergeron, L. A., Besenbacher, S., Zheng, J., Li, P., Bertelsen, M. F., Quintard, B., ... & Zhang, G. (2023). Evolution of the germline mutation rate across vertebrates. Nature, 1-59.
54	fish	Atlantic salmon	Salmo salar	4.31e-09	NO	1		Bergeron, L. A., Besenbacher, S., Zheng, J., Li, P., Bertelsen, M. F., Quintard, B., ... & Zhang, G. (2023). Evolution of the germline mutation rate across vertebrates. Nature, 1-60.
55	birds	Southern screamer	Chauna torquata	7.06e-09	NO	1		Bergeron, L. A., Besenbacher, S., Zheng, J., Li, P., Bertelsen, M. F., Quintard, B., ... & Zhang, G. (2023). Evolution of the germline mutation rate across vertebrates. Nature, 1-61.
56	mammals	Antarctic fur seal	Arctocephalus gazella	6.78e-09	NO	4		Bergeron, L. A., Besenbacher, S., Zheng, J., Li, P., Bertelsen, M. F., Quintard, B., ... & Zhang, G. (2023). Evolution of the germline mutation rate across vertebrates. Nature, 1-62.
57	mammals	Chinese tree shrew	Tupaia chinensis belangeri	7.5e-09	NO	3		Bergeron, L. A., Besenbacher, S., Zheng, J., Li, P., Bertelsen, M. F., Quintard, B., ... & Zhang, G. (2023). Evolution of the germline mutation rate across vertebrates. Nature, 1-63.
58	mammals	deer	Cervus nippon	4.7e-09	NO	1		Bergeron, L. A., Besenbacher, S., Zheng, J., Li, P., Bertelsen, M. F., Quintard, B., ... & Zhang, G. (2023). Evolution of the germline mutation rate across vertebrates. Nature, 1-64.
59	fish	Tongue sole	Cynoglossus semilaevis	9.13e-09	NO	3		Bergeron, L. A., Besenbacher, S., Zheng, J., Li, P., Bertelsen, M. F., Quintard, B., ... & Zhang, G. (2023). Evolution of the germline mutation rate across vertebrates. Nature, 1-65.
60	birds	Roseate spoonbill	Platalea ajaja	1.69e-08	NO	1		Bergeron, L. A., Besenbacher, S., Zheng, J., Li, P., Bertelsen, M. F., Quintard, B., ... & Zhang, G. (2023). Evolution of the germline mutation rate across vertebrates. Nature, 1-66.
61	birds	Siberian stonechat	Saxicola maurus	6.68e-09	NO	5		Bergeron, L. A., Besenbacher, S., Zheng, J., Li, P., Bertelsen, M. F., Quintard, B., ... & Zhang, G. (2023). Evolution of the germline mutation rate across vertebrates. Nature, 1-67.
62	mammals	Malay tapir	Tapirus indicus	4.8e-09	NO	1		Bergeron, L. A., Besenbacher, S., Zheng, J., Li, P., Bertelsen, M. F., Quintard, B., ... & Zhang, G. (2023). Evolution of the germline mutation rate across vertebrates. Nature, 1-68.
63	reptiles	gecko	Coleonyx brevis	6.33e-09	NO	1		Bergeron, L. A., Besenbacher, S., Zheng, J., Li, P., Bertelsen, M. F., Quintard, B., ... & Zhang, G. (2023). Evolution of the germline mutation rate across vertebrates. Nature, 1-69.
64	mammals	tiger	Panthera tigris	6.99e-09	NO	1		Bergeron, L. A., Besenbacher, S., Zheng, J., Li, P., Bertelsen, M. F., Quintard, B., ... & Zhang, G. (2023). Evolution of the germline mutation rate across vertebrates. Nature, 1-70.
65	reptiles	Painted turtle	Chrysemys picta	4.61e-09	NO	9		Bergeron, L. A., Besenbacher, S., Zheng, J., Li, P., Bertelsen, M. F., Quintard, B., ... & Zhang, G. (2023). Evolution of the germline mutation rate across vertebrates. Nature, 1-71.
66	birds	Griffon vulture	Gyps fulvus	2.61e-09	NO	1		Bergeron, L. A., Besenbacher, S., Zheng, J., Li, P., Bertelsen, M. F., Quintard, B., ... & Zhang, G. (2023). Evolution of the germline mutation rate across vertebrates. Nature, 1-72.
67	mammals	Walrus	Odobenus rosmarus	1.32e-08	NO	1		Bergeron, L. A., Besenbacher, S., Zheng, J., Li, P., Bertelsen, M. F., Quintard, B., ... & Zhang, G. (2023). Evolution of the germline mutation rate across vertebrates. Nature, 1-73.
68	birds	Zebra finch	Taeniopygia guttata	5.84e-09	NO	2		Bergeron, L. A., Besenbacher, S., Zheng, J., Li, P., Bertelsen, M. F., Quintard, B., ... & Zhang, G. (2023). Evolution of the germline mutation rate across vertebrates. Nature, 1-74.
69	fish	cichlid fish	Amphilophus	6.6e-08	NO	7		Recknagel, H., Elmer, K. R., & Meyer, A. (2013). A hybrid genetic linkage map of two ecologically and morphologically divergent Midas cichlid fishes (Amphilophus spp.) obtained by massively parallel DNA sequencing (ddRADSeq). G3: Genes| Genomes| Genetics, 3(1), 65-74.
70	birds	flycatcher	Ficedula albicollis	4.6e-09	NO	11		Smeds, L., Qvarnström, A., & Ellegren, H. (2016). Direct estimate of the rate of germline mutation in a bird. Genome research, 26(9), 1211-1218.
71	primates	green monkey	Chlorocebus sabaeus	9.4e-09	NO	1		Pfeifer, S. P. (2017). Direct estimate of the spontaneous germ line mutation rate in African green monkeys. Evolution, 71(12), 2858-2870.
72	mammals	platypus	Ornithorhynchus anatinus	7.01e-09	NO	1		Martin, H. C., Batty, E. M., Hussin, J., Westall, P., Daish, T., Kolomyjec, S., ... & Donnelly, P. (2018). Insights into platypus population structure and history from whole-genome sequencing. Molecular Biology and Evolution, 35(5), 1238-1252.
73	primates	owl monkey	Aotus nancymaae	8.14e-09	NO	14		Thomas, G. W., Wang, R. J., Puri, A., Harris, R. A., Raveendran, M., Hughes, D. S., ... & Hahn, M. W. (2018). Reproductive longevity predicts mutation rates in primates. Current Biology, 28(19), 3193-3197.
74	fish	cichlid fish	Amphilophus	3.5e-09	NO	1		Malinsky, M., Svardal, H., Tyers, A. M., Miska, E. A., Genner, M. J., Turner, G. F., & Durbin, R. (2018). Whole-genome sequences of Malawi cichlids reveal multiple radiations interconnected by gene flow. Nature ecology & evolution, 2(12), 1940-1955.
75	primates	chimpanzee	Pan troglodytes	1.06e-08	NO	7		Besenbacher, S., Hvilsom, C., Marques-Bonet, T., Mailund, T., & Schierup, M. H. (2019). Direct estimation of mutations in great apes reconciles phylogenetic dating. Nature ecology & evolution, 3(2), 286-292.
76	primates	gorilla	Gorilla gorilla	1.13e-08	NO	2		Besenbacher, S., Hvilsom, C., Marques-Bonet, T., Mailund, T., & Schierup, M. H. (2019). Direct estimation of mutations in great apes reconciles phylogenetic dating. Nature ecology & evolution, 3(2), 286-293.
77	primates	orangutan	Pongo abelii	1.66e-08	NO	1		Besenbacher, S., Hvilsom, C., Marques-Bonet, T., Mailund, T., & Schierup, M. H. (2019). Direct estimation of mutations in great apes reconciles phylogenetic dating. Nature ecology & evolution, 3(2), 286-294.
78	primates	rhesus macaque	Macaca mulatta	5.8e-09	NO	4		Wang, R. J., Thomas, G. W., Raveendran, M., Harris, R. A., Doddapaneni, H., Muzny, D. M., ... & Hahn, M. W. (2020). Paternal age in rhesus macaques is positively associated with germline mutation accumulation but not with measures of offspring sociability. Genome research, 30(6), 826-834.
79	primates	marmoset	Callithrix jacchus	4.3e-09	NO	1		Yang, C., Zhou, Y., Marcus, S., Formenti, G., Bergeron, L. A., Song, Z., ... & Zhang, G. (2021). Evolutionary and biomedical insights from a marmoset diploid genome assembly. Nature, 594(7862), 227-233.
80	arthropods	fruit fly	Drosophila pseudoobscura	3.5e-09	NO	10		Krasovec, M. (2021). The spontaneous mutation rate of Drosophila pseudoobscura. G3, 11(7), jkab151.
81	primates	mouse lemur	Microcebus murinus	1.52e-08	NO	4		Campbell, C. R., Tiley, G. P., Poelstra, J. W., Hunnicutt, K. E., Larsen, P. A., Lee, H. J., ... & Yoder, A. D. (2021). Pedigree-based and phylogenetic methods support surprising patterns of mutation rate and spectrum in the gray mouse lemur. Heredity, 127(2), 233-244.
82	mammals	cat	Felis catus	8.6e-09	NO	11		Wang, R. J., Raveendran, M., Harris, R. A., Murphy, W. J., Lyons, L. A., Rogers, J., & Hahn, M. W. (2022). De novo mutations in domestic cat are consistent with an effect of reproductive longevity on both the rate and spectrum of mutations. Molecular Biology and Evolution, 39(7), msac147.
83	mammals	bear	Ursus arctos	8.4e-09	NO	4		Wang, R. J., Peña-Garcia, Y., Bibby, M. G., Raveendran, M., Harris, R. A., Jansen, H. T., ... & Hahn, M. W. (2022). Examining the effects of hibernation on germline mutation rates in grizzly bears. Genome Biology and Evolution.
84	fish	guppy	Poecilia reticulata	1.35e-08	NO	10		Lin, Y., Darolti, I., van der Bijl, W., Morris, J., & Mank, J. E. (2023). Extensive variation in germline de novo mutations in Poecilia reticulata. Genome research, 33(8), 1317–1324
85	fish	stickleback	Pungitius pungitius	4.83e-09	NO	54	Pori, Finland	Zhang, C., Reid, K., Sands, A. F., Fraimout, A., Schierup, M. H., & Merilä, J. (2023). De novo mutation rates in sticklebacks. Molecular Biology and Evolution, 40(9), msad192.
86	fish	stickleback	Pungitius pungitius	4.29e-09	NO	52	Tvärminne, Finland	Zhang, C., Reid, K., Sands, A. F., Fraimout, A., Schierup, M. H., & Merilä, J. (2023). De novo mutation rates in sticklebacks. Molecular Biology and Evolution, 40(9), msad192.
87	Echinodermata	crown-of-thorns sea star	Acanthaster solaris	9.13e-09	NO	14		Popovic, I., Bergeron, L., Bozec, Y. M., Waldvogel, A. M., Howitt, S. M., Damjanovic, K., ... & Riginos, C. (2023). High germline mutation rates but not extreme population size outbreaks influence genetic diversity in crown-of-thorns sea stars. bioRxiv, 2023-06.
88	mammals	Gray short-tailed opossum	Monodelphis domestica	2.56e-09	NO	22		Peña-Garcia, Y., Wang, R. J., Raveendran, M., Harris, R. A., Samollow, P. B., Rogers, J., & Hahn, M. W. (2024). Low mutation rate but high male-bias in the germline of a short-lived opossum. bioRxiv : the preprint server for biology, 2024.12.05.627076
89	mollusk	white abalone	Haliotis sorenseni	8.6e-09	NO	9		Wooldridge, T. B., Ford, S. M., Conwell, H. C., Hyde, J., Harris, K., & Shapiro, B. (2025). Direct Measurement of the Mutation Rate and Its Evolutionary Consequences in a Critically Endangered Mollusk. Molecular biology and evolution, 42(1), msae266
90	primates	Aye-Aye	Daubentonia madagascariensis	2e-08	NO	10		Versoza, C. J., Ehmke, E. E., Jensen, J. D., & Pfeifer, S. P. (2024). Characterizing the rates and patterns of de novo germline mutations in the aye-aye (Daubentonia madagascariensis). bioRxiv : the preprint server for biology, 2024.11.08.622690.
91	mammals	lion	Panthera leo	5.42e-09	NO	2		Armstrong, E. E., Carey, S. B., Harkess, A., Zenato Lazzari, G., Solari, K. A., Maldonado, J. E., Fleischer, R. C., Aziz, N., Walsh, P., Koepfli, K. P., Eizirik, E., Petrov, D. A., & Campana, M. G. (2025). Parameterizing Pantherinae: De Novo Mutation Rate Estimates from Panthera and Neofelis Pedigrees. Genome biology and evolution, 17(4), evaf060.
92	mammals	tiger	Panthera tigris	7.45e-09	NO	2		Armstrong, E. E., Carey, S. B., Harkess, A., Zenato Lazzari, G., Solari, K. A., Maldonado, J. E., Fleischer, R. C., Aziz, N., Walsh, P., Koepfli, K. P., Eizirik, E., Petrov, D. A., & Campana, M. G. (2025). Parameterizing Pantherinae: De Novo Mutation Rate Estimates from Panthera and Neofelis Pedigrees. Genome biology and evolution, 17(4), evaf061.
93	mammals	snow leopard	Panthera uncia	3.62e-09	NO	2		Armstrong, E. E., Carey, S. B., Harkess, A., Zenato Lazzari, G., Solari, K. A., Maldonado, J. E., Fleischer, R. C., Aziz, N., Walsh, P., Koepfli, K. P., Eizirik, E., Petrov, D. A., & Campana, M. G. (2025). Parameterizing Pantherinae: De Novo Mutation Rate Estimates from Panthera and Neofelis Pedigrees. Genome biology and evolution, 17(4), evaf062.
94	mammals	jaguar	Panthera onca	5e-09	NO	4		Armstrong, E. E., Carey, S. B., Harkess, A., Zenato Lazzari, G., Solari, K. A., Maldonado, J. E., Fleischer, R. C., Aziz, N., Walsh, P., Koepfli, K. P., Eizirik, E., Petrov, D. A., & Campana, M. G. (2025). Parameterizing Pantherinae: De Novo Mutation Rate Estimates from Panthera and Neofelis Pedigrees. Genome biology and evolution, 17(4), evaf063.
95	mammals	leopard	Panthera pardus	7.56e-09	NO	1		Armstrong, E. E., Carey, S. B., Harkess, A., Zenato Lazzari, G., Solari, K. A., Maldonado, J. E., Fleischer, R. C., Aziz, N., Walsh, P., Koepfli, K. P., Eizirik, E., Petrov, D. A., & Campana, M. G. (2025). Parameterizing Pantherinae: De Novo Mutation Rate Estimates from Panthera and Neofelis Pedigrees. Genome biology and evolution, 17(4), evaf064.
96	mammals	clouded leopard	Neofelis nebulosa	3.8e-09	NO	2		Armstrong, E. E., Carey, S. B., Harkess, A., Zenato Lazzari, G., Solari, K. A., Maldonado, J. E., Fleischer, R. C., Aziz, N., Walsh, P., Koepfli, K. P., Eizirik, E., Petrov, D. A., & Campana, M. G. (2025). Parameterizing Pantherinae: De Novo Mutation Rate Estimates from Panthera and Neofelis Pedigrees. Genome biology and evolution, 17(4), evaf065.
97	fish	stickleback	Gasterosteus aculeatus	5.11e-09	NO	48		Zhang, C., Reid, K., Schierup, M. H., Wang, H., Candolin, U., & Merilä, J. (2025). Rate of de novo mutations in the three-spined stickleback. Heredity, 134(7), 387–395.
98	mammals	dog	Canis familiaris	4.89e-09	NO	43		Zhang, S. J., Ma, J., Riera, M., Besenbacher, S., Niskanen, J. E., Salokorpi, N., Hundi, S., Hytönen, M. K., Zhou, T., Li, G. M., Ostrander, E. A., Schierup, M. H., Lohi, H., & Wang, G. D. (2025). Determinants of de novo mutations in extended pedigrees of 43 dog breeds. Genome biology, 26(1), 305.
99	arthropods	fruit fly	Drosophila melanogaster	2.8e-09	YES	1		Keightley, P. D., Ness, R. W., Halligan, D. L., & Haddrill, P. R. (2014). Estimation of the spontaneous mutation rate per nucleotide site in a Drosophila melanogaster full-sib family. Genetics, 196(1), 313-320.
100	arthropods	butterfly	Heliconius melpomene	2.8e-09	YES	1		Keightley, P. D., Pinharanda, A., Ness, R. W., Simpson, F., Dasmahapatra, K. K., Mallet, J., ... & Jiggins, C. D. (2015). Estimation of the spontaneous mutation rate in Heliconius melpomene. Molecular biology and evolution, 32(1), 239-243.
101	arthropods	bumblebee	Bombus terrestris	3.58e-09	YES	32		Liu, H., Jia, Y., Sun, X., Tian, D., Hurst, L. D., & Yang, S. (2017). Direct determination of the mutation rate in the bumblebee reveals evidence for weak recombination-associated mutation and an approximate rate constancy in insects. Molecular biology and evolution, 34(1), 119-130.
102	fish	atlantic herring	Clupea harengus	2e-09	YES	2		Feng, C., Pettersson, M., Lamichhaney, S., Rubin, C. J., Rafati, N., Casini, M., ... & Andersson, L. (2017). Moderate nucleotide diversity in the Atlantic herring is associated with a low mutation rate. Elife, 6, e23907.
103	primates	chimpanzee	Pan troglodytes	1.48e-08	YES	1		Tatsumoto, S., Go, Y., Fukuta, K., Noguchi, H., Hayakawa, T., Tomonaga, M., ... & Fujiyama, A. (2017). Direct estimation of de novo mutation rates in a chimpanzee parent-offspring trio by ultra-deep whole genome sequencing. Scientific reports, 7(1), 1-12.
104	mammals	wolf	Canis lupus	4.5e-09	YES	1		Koch, E. M., Schweizer, R. M., Schweizer, T. M., Stahler, D. R., Smith, D. W., Wayne, R. K., & Novembre, J. (2019). De novo mutation rate estimation in wolves of known pedigree. Molecular biology and evolution, 36(11), 2536-2547.
105	primates	rhesus macaque	Macaca mulatta	7.7e-09	YES	19		Bergeron, L. A., Besenbacher, S., Bakker, J., Zheng, J., Li, P., Pacheco, G., ... & Zhang, G. (2021). The germline mutational process in rhesus macaque and its implications for phylogenetic dating. GigaScience, 10(5), giab029.
106	arthropods	mosquito	Anopheles coluzzii	1e-09	YES	29		Rashid, I., Campos, M., Collier, T., Crepeau, M., Weakley, A., Gripkey, H., ... & Lanzaro, G. C. (2022). Spontaneous mutation rate estimates for the principal malaria vectors Anopheles coluzzii and Anopheles stephensi. Scientific reports, 12(1), 1-11.
107	arthropods	mosquito	Anopheles stephensi	1.36e-09	YES	30		Rashid, I., Campos, M., Collier, T., Crepeau, M., Weakley, A., Gripkey, H., ... & Lanzaro, G. C. (2022). Spontaneous mutation rate estimates for the principal malaria vectors Anopheles coluzzii and Anopheles stephensi. Scientific reports, 12(1), 1-11.
108	mammals	pig	Sus scrofa	3.6e-09	YES	5		Zhang, M., Yang, Q., Ai, H., & Huang, L. (2022). Revisiting the evolutionary history of pigs via de novo mutation rate estimation in a three-generation pedigree. Genomics, Proteomics & Bioinformatics.
109	arthropods	fruit fly	Drosophila melanogaster	1.67e-09	YES	6	Nigeria populatuion	Wang, Y., McNeil, P., Abdulazeez, R., Pascual, M., Johnston, S. E., Keightley, P. D., & Obbard, D. J. (2022). Variation in mutation, recombination, and transposition rates in Drosophila melanogaster and Drosophila simulans. bioRxiv.
110	arthropods	fruit fly	Drosophila melanogaster	4.86e-09	YES	6	UK population	Wang, Y., McNeil, P., Abdulazeez, R., Pascual, M., Johnston, S. E., Keightley, P. D., & Obbard, D. J. (2022). Variation in mutation, recombination, and transposition rates in Drosophila melanogaster and Drosophila simulans. bioRxiv.
111	arthropods	fruit fly	Drosophila simulans	4.51e-09	YES	6		Wang, Y., McNeil, P., Abdulazeez, R., Pascual, M., Johnston, S. E., Keightley, P. D., & Obbard, D. J. (2022). Variation in mutation, recombination, and transposition rates in Drosophila melanogaster and Drosophila simulans. bioRxiv.
112	arthropods	silkworm	Bombyx mori	4.1e-09	YES	30		Han, M., Ren, J., Guo, H., Tong, X., Hu, H., Lu, K., ... & Dai, F. (2023). Mutation Rate and Spectrum of the Silkworm in Normal and Temperature Stress Conditions. Genes, 14(3), 649.
113	fish	guppy	Poecilia reticulata	2.9e-09	YES	20		Burda, K., & Konczal, M. (2023). Validation of machine learning approach for direct mutation rate estimation. Molecular Ecology Resources, 00, 1– 15. https://doi.org/10.1111/1755-0998.13841
114	birds	epaulette shark	Hemiscyllium ocellatum	7e-10	YES	9		Sendell-Price, A. T., Tulenko, F. J., Pettersson, M., Kang, D., Montandon, M., Winkler, S., Kulb, K., Naylor, G. P., Phillippy, A., Fedrigo, O., Mountcastle, J., Balacco, J. R., Dutra, A., Dale, R. E., Haase, B., Jarvis, E. D., Myers, G., Burgess, S. M., Currie, P. D., Andersson, L., … Schartl, M. (2023). Low mutation rate in epaulette sharks is consistent with a slow rate of evolution in sharks.…
115	Platyhelminthes	freshwater flatworm	Schmidtea polychroa	1.31e-08	YES	4		Póti, Á., Szüts, D., & Vermezovic, J. (2024). Mutational profile of the regenerative process and de novo genome assembly of the planarian Schmidtea polychroa. Nucleic acids research, 52(4), 1779–1792.
116	birds	zebra finch	Taeniopygia guttata	6.25e-09	YES	16		Liang, X., Yang, S., Wang, D., & Knief, U. (2024). Characterization and distribution of de novo mutations in the zebra finch. Communications biology, 7(1), 1243. https://doi-org.eproxy.lib.hku.hk/10.1038/s42003-024-06945-5

## Sheet: TableS2. Mapping depth
Table S1. Mapping depth (DP) of each individual with different approaches.
Sample ID	LRS	SRS	Hybrid_15x	Hybrid_30x	Hybrid_45x	Hybrid_60x	Hybrid_75x
T4_Fa	33	33	16	32	48	63	79
T4_Mo	32	32	16	31	46	62	77
T4_O1	33	35	17	33	49	66	82
T4_O2	28	26	13	26	39	52	64
T4_O3	24	25	13	26	39	52	65
T4_O4	25	28	14	28	43	57	71
T4_O5	34	26	14	29	43	57	71
T4_O6	28	29	15	30	45	60	75
Mean	30	29	15	29	44	59	73

## Sheet: TableS3. DNM
Table S2. Distribution, base substitution and validation of the loach candidate DNMs.
Offspring ID	Location	Position	Region	REF	ALT	Validation
O1	Chr02	2683775	Intergenic	G	T	True DNM
O1	Chr02	2683810	Intergenic	G	T	True DNM
O1	Chr07	137079	Intergenic (Repeat)	G	A	False positive
O1	Chr12	14960923	Exonic	C	T	True DNM
O1	Chr20	13054525	Intergenic	C	T	Not validated
O1	Chr24	33863613	Intergenic	T	C	True DNM
O2	Chr01	31264409	Intronic	T	A	True DNM
O2	Chr01	31264410	Intronic	A	T	True DNM
O3	Chr02	2683775	Intergenic	G	T	True DNM
O3	Chr02	2683810	Intergenic	G	T	True DNM
O3	Chr04	1267339	Intronic	A	T	True DNM
O3	Chr10	2368237	Intronic	G	T	True DNM
O4	Chr02	2683775	Intergenic	G	T	True DNM
O4	Chr02	2683810	Intergenic	G	T	True DNM
O4	Chr04	1726574	Intronic	A	C	Not validated
O4	Chr04	22123480	Intergenic (Repeat)	A	C	True DNM
O4	Chr04	22123482	Intergenic	G	A	True DNM
O4	Chr10	2368237	Intronic	G	T	True DNM
O4	Chr16	2872224	Intronic	G	A	False positive
O4	Chr20	6097967	Intergenic	G	A	True DNM
O5	Chr04	20595465	Intronic	C	T	True DNM
O5	Chr11	18823918	Intronic	G	C	True DNM
O5	Chr15	4033774	Intronic	A	T	True DNM
O5	Chr18	13608141	Intergenic	C	A	True DNM
O5	Chr19	3595051	Intronic	T	A	True DNM
O5	Chr21	21158796	Intronic	A	T	False positive
O6	Chr04	22568642	Intronic	C	T	True DNM
O6	Chr05	6845391	Intergenic (Repeat)	G	A	True DNM
O6	Chr05	6845392	Intergenic (Repeat)	C	T	True DNM
O6	Chr13	13220437	Intronic	T	G	False positive
O6	Chr16	17777266	Intergenic	G	A	True DNM
O6	Chr18	4434220	Intronic	C	T	True DNM

## Sheet: TableS4. FNRvsDP
Table S3. False negative rates (FNR) of hybrid datasets under different mapping depths across family trios.
Trio	Hybrid_15x		Hybrid_30x		Hybrid_45x		Hybrid_60x		Hybrid_75x
	Depth(x)	FNR	Depth(x)	FNR	Depth(x)	FNR	Depth(x)	FNR	Depth(x)	FNR
T4O1	17	0	33	0	49	0	49	0	80	0
T4O2	13	1	26	0	39	0	39	0	74	0
T4O3	13	0.5	26	0	39	0	39	0	74	0
T4O4	14	0.17	28	0.17	43	0	43	0	76	0
T4O5	14	0.2	29	0	43	0	43	0	76	0
T4O6	15	0.6	30	0.4	45	0	45	0	77	0

## Sheet: TableS5. F1 score
Table S4. Performance comparison of different approaches at different mapping depths.
	Hybrid_75x	Hybrid_60x	Hybrid_45x	Hybrid_ 30x	Hybrid_15x	LRS_DeepVariant	LRS_DeepTrio	LRS_GATK	SRS_DeepVariant	SRS_DeepTrio	SRS_GATK
Candidate DNMs	29	29	29	27	21	27	24	26	26	26	25
True DNMs	26	26	26	23	17	23	21	22	23	23	21
False positive sites	1	1	1	2	2	3	2	3	1	1	2
Unknown	2	2	2	2	2	1	1	1	2	2	2
False positive rate	0.04	0.04	0.04	0.08	0.11	0.12	0.09	0.12	0.04	0.04	0.09
False negative rate	0	0	0	0.12	0.35	0.12	0.19	0.15	0.12	0.12	0.19
Precision	0.96	0.96	0.96	0.92	0.89	0.88	0.91	0.88	0.96	0.96	0.91
Recall	1	1	1	0.88	0.65	0.88	0.81	0.85	0.88	0.88	0.81
F1 score	0.98	0.98	0.98	0.9	0.76	0.88	0.86	0.86	0.92	0.92	0.86

## Sheet: TableS6. Mutation rate
Table S5. Parameters for de novo mutation rate estimation for each loach trio. The % represents the percentage of the callable genome of the whole autosome genome (excluding the sex region).
	Offspring ID	Hybrid_75x	Hybrid_60x	Hybrid_45x	Hybrid_15x	Hybrid_30x	LRS_DeepTrio	LRS_GATK	LRS_DeepVariant	SRS_DeepTrio	SRS_GATK	SRS_DeepVariant
True DNM	T4_O1	4	4	4	4	4	4	4	4	4	2	4
	T4_O2	2	2	2	0	2	2	2	2	0	1	2
	T4_O3	4	4	4	2	4	3	3	4	4	4	4
	T4_O4	6	6	6	5	5	4	4	4	6	6	6
	T4_O5	5	5	5	4	5	3	4	4	5	4	5
	T4_O6	5	5	5	2	3	5	5	5	2	5	2
CG	T4_O1	445438249 (81%)	442385964 (80%)	452710192 (82%)	456100288 (83%)	463357780 (84%)	457635624 (83%)	465603677 (84%)	462119216 (84%)	453701606 (82%)	451949642 (82%)	453643509 (82%)
	T4_O2	429279514 (78%)	423288180 (77%)	437238341 (79%)	440739486 (80%)	449846199 (82%)	451681834 (82%)	459621161 (83%)	455140017 (83%)	435581949 (79%)	434052276 (79%)	435610849 (79%)
	T4_O3	429278605 (78%)	423039039 (77%)	437826720 (79%)	441824567 (80%)	451476327 (82%)	440306395 (80%)	449855851 (82%)	443701356 (80%)	430895288 (78%)	429639442 (78%)	430858113 (78%)
	T4_O4	430484900 (78%)	424373200 (77%)	437866762 (79%)	441795059 (80%)	453002556 (82%)	444599282 (81%)	451736326 (82%)	446069152 (81%)	433063336 (78%)	430705377 (78%)	432965760 (78%)
	T4_O5	439170779 (80%)	435856439 (79%)	447126170 (81%)	449373358 (81%)	457577576 (83%)	458840326 (83%)	465038615 (84%)	461521546 (84%)	438422958 (79%)	437008409 (79%)	438372225 (79%)
	T4_O6	441318858 (80%)	437853075 (79%)	449056896 (81%)	452489143 (82%)	460182424 (83%)	453245953 (82%)	458958221 (83%)	455120501 (82%)	445811976 (81%)	444000135 (80%)	445753367 (81%)
fFNR	T4_O1	0.04	0.04	0.05	0.17	0.08	0.09	0.08	0.07	0.12	0.09	0.07
	T4_O2	0.04	0.05	0.07	0.19	0.1	0.1	0.09	0.08	0.15	0.12	0.1
	T4_O3	0.05	0.05	0.07	0.19	0.1	0.11	0.11	0.09	0.15	0.12	0.11
	T4_O4	0.05	0.06	0.08	0.21	0.12	0.11	0.11	0.09	0.18	0.15	0.13
	T4_O5	0.04	0.04	0.05	0.17	0.09	0.08	0.08	0.06	0.14	0.11	0.09
	T4_O6	0.04	0.05	0.06	0.17	0.09	0.1	0.1	0.08	0.13	0.1	0.08
µtrio (×10-9)	T4_O1	4.68	4.73	4.67	5.26	4.69	4.79	4.67	4.63	5	2.44	4.73
	T4_O2	2.44	2.49	2.45	0	2.48	2.45	2.4	2.38	0	1.31	2.56
	T4_O3	4.89	5	4.89	2.78	4.94	3.84	3.73	4.96	5.48	5.32	5.19
	T4_O4	7.36	7.52	7.42	7.18	6.26	5.06	4.96	4.92	8.41	8.23	7.97
	T4_O5	5.91	5.99	5.92	5.37	5.98	3.57	4.67	4.63	6.64	5.16	6.3
	T4_O6	5.93	6	5.91	2.66	3.57	6.14	6.02	5.97	2.59	6.29	2.45
Mean µ		5.2	5.29	5.21	3.88	4.65	4.31	4.41	4.58	4.69	4.79	4.87
95% CI lower		3.47	3.52	3.46	1.19	3.15	2.95	3.12	3.34	1.55	2.13	2.62
95% CI upper		6.94	7.06	6.96	6.56	6.16	5.67	5.7	5.83	7.83	7.45	7.12

## Sheet: TableS7. Mutation rate of fish
Scientific name	Common name	μ	95%CI_low	95%CI_high	Validation	Reference
Hemiscyllium ocellatum	Epaulette shark	0.7	NA	NA	Sanger sequencing	Sendell-Price et al. 2023
Clupea harengus	Herring	2	1.1	2.9	Sanger sequencing	Feng et al. 2017
Larimichthys crocea	Large yellow croaker	3.08	0.9	7	IGV	﻿Bergeron et al. 2023
Astatotilapia calliptera, Aulonocara stuartgranti, Lethrinops lethrinus	Cichlid	3.5	1.6	4.6	IGV	Malinsky et al. 2018
Pungitius pungitius	Nine-spined stickleback	4.61	4.05	5.17	IGV	Zhang et al. 2023
Salmo salar	Atlantic salmon	4.95	2.5	8.23	IGV	﻿Bergeron et al. 2023
Betta splendens	Siamese fighting fish	4.97	NA	NA	IGV	﻿Bergeron et al. 2023
Gasterosteus aculeatus	Three-spined stickleback	5.1	4.08	6.13	IGV	Zhang et al. 2025
Oreonectes platycephalus	Flat-headed loach	5.23	3.48	6.99	Sanger sequencing	This study
Syngnathus scovelli	Gulf pipefish	5.58	NA	NA	IGV	﻿Bergeron et al. 2023
Cyprinus carpio	Common carp	6.71	2.05	14.75	IGV	﻿Bergeron et al. 2023
Amphiprion ocellaris	Common clownfish	7.93	4.75	12.14	IGV	﻿Bergeron et al. 2023
Paralichthys olivaceus	Japanese flounder	7.95	4.58	12.3	IGV	﻿Bergeron et al. 2023
Cynoglossus semilaevis	Tongue sole	8.62	5.09	13.11	IGV	﻿Bergeron et al. 2023
Poecilia reticulata	Guppy	9.28	6.3	12.26	Sanger sequencing	Lin et al. 2023;
						Burda & Konczal, 2023
